# Supplementary material for: Optimization of Ultrasonic-Assisted Extraction of α-Glucosidase Inhibitors from Dryopteris crassirhizoma Using Artificial Neural Network and Response Surface Methodology
Source: MDPI journal article supplement (doi:10.3390/metabo13040557), 2023-04-13
Supplement: s1 [file s1]

Supplemental material

# Optimization of ultrasonic-assisted extraction of $\alpha$ -glucosidase inhibitors from *Dryopteris crassirhizoma* using artificial neural network and response surface methodology

Nguyen Viet Phong <sup>1,2,†</sup>, Dan Gao <sup>3,†</sup>, Jeong Ah Kim <sup>1,2,\*</sup>, Seo Young Yang <sup>4,\*</sup>

<sup>1</sup> Vessel-Organ Interaction Research Center, VOICE (MRC), College of Pharmacy, Kyungpook National University, Daegu 41566, Korea; [ngvietphong@gmail.com](mailto:ngvietphong@gmail.com) (N.V.P.), [jkim6923@knu.ac.kr](mailto:jkim6923@knu.ac.kr) (J.A.K.)

<sup>2</sup> BK21 FOUR Community-Based Intelligent Novel Drug Discovery Education Unit, College of Pharmacy and Research Institute of Pharmaceutical Sciences, Kyungpook National University, Daegu 41566, Korea

<sup>3</sup> Institute of Chinese Materia Medica, China Academy of Chinese Medical Sciences, Beijing 100700, China; [dgao@icmm.ac.cn](mailto:dgao@icmm.ac.cn) (D.G.)

<sup>4</sup> Department of Pharmaceutical Engineering, Sangji University, 83 Sangjidae-gil, Wonju 26339, Korea; [syyang@sangji.ac.kr](mailto:syyang@sangji.ac.kr) (S.Y.Y.)

\* Correspondence: [jkim6923@knu.ac.kr](mailto:jkim6923@knu.ac.kr) (J.A.K.); [syyang@sangji.ac.kr](mailto:syyang@sangji.ac.kr) (S.Y.Y.); Tel.: +82-53-950-8574 (J.A.K.); +82-33-738-7921 (S.Y.Y.)

† These authors contributed equally to this work.

**Figure S1.** Selection of variables for RSM optimization

**Figure S2.** The HPLC-UV chromatographs of DC with flavaspidic acid AP (1)

**Figure S3.** The HPLC-UV chromatographs of DC with nortrisflavaspidic acid ABB (2)

**Figure S4.** ESI-MS spectrum (positive mode and negative mode) of flavaspidic acid AP (1)

**Figure S5.**  $^1\text{H}$ -NMR spectrum ( $\text{CD}_3\text{OD}$ , 500 MHz) of nortrisflavaspidic acid ABB (2)

**Figure S6.**  $^{13}\text{C}$ -NMR spectrum ( $\text{CD}_3\text{OD}$ , 125 MHz) of nortrisflavaspidic acid ABB (2)

**Figure S7.** HR-ESI-MS spectrum (negative mode) of nortrisflavaspidic acid ABB (2)

**Figure S8.** The prediction graphs for them training, validation, and test of the established network

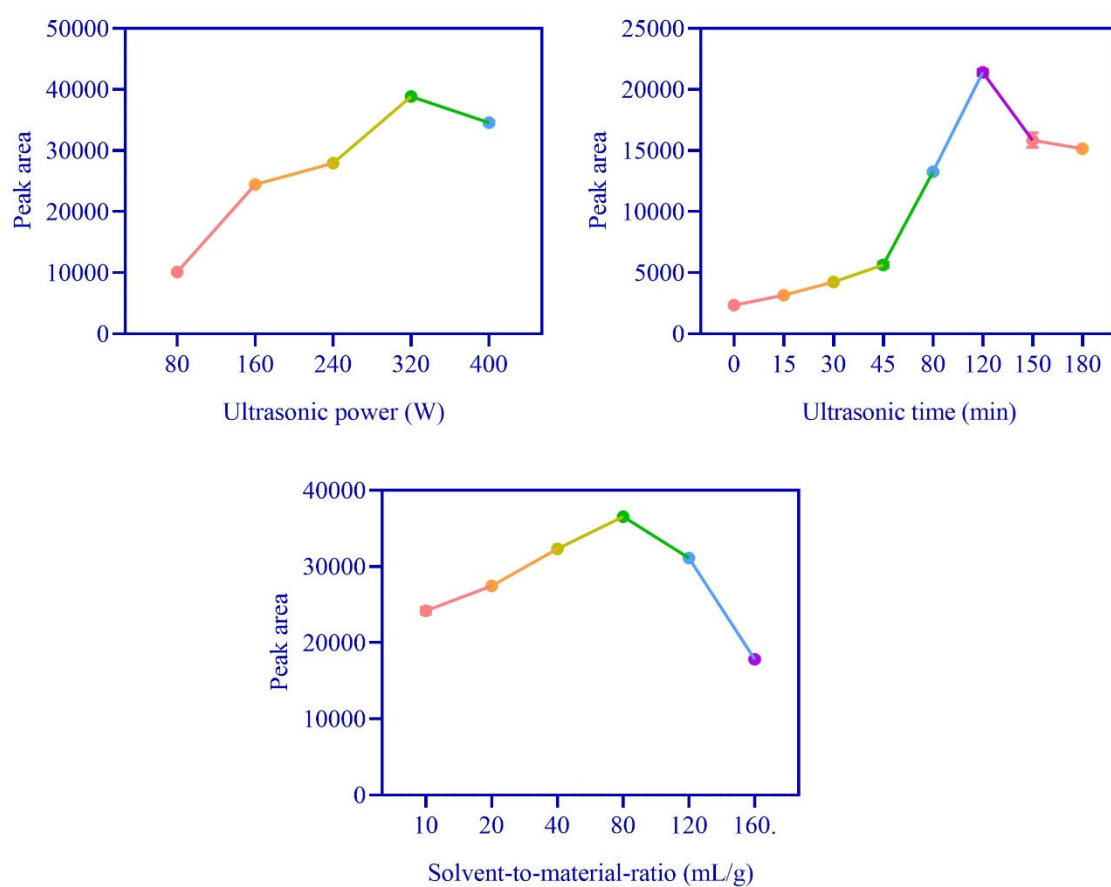

**Figure S1.** Selection of variables for RSM optimization

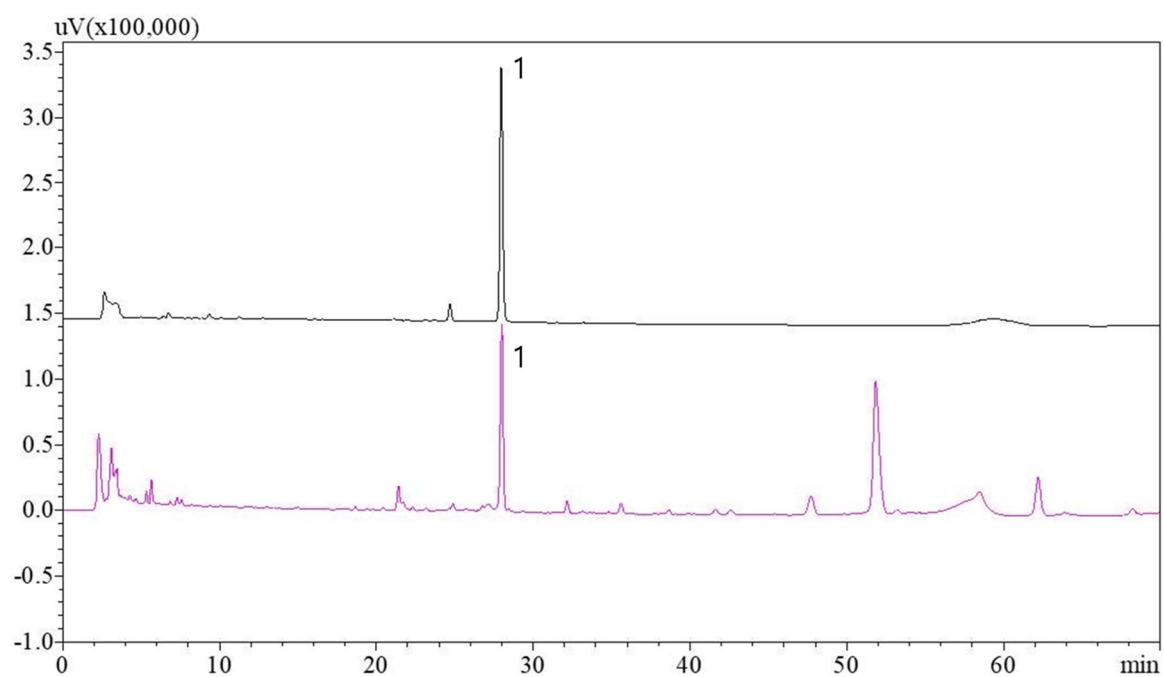

**Figure S2.** The HPLC-UV chromatographs of DC with flavaspidic acid AP (1)

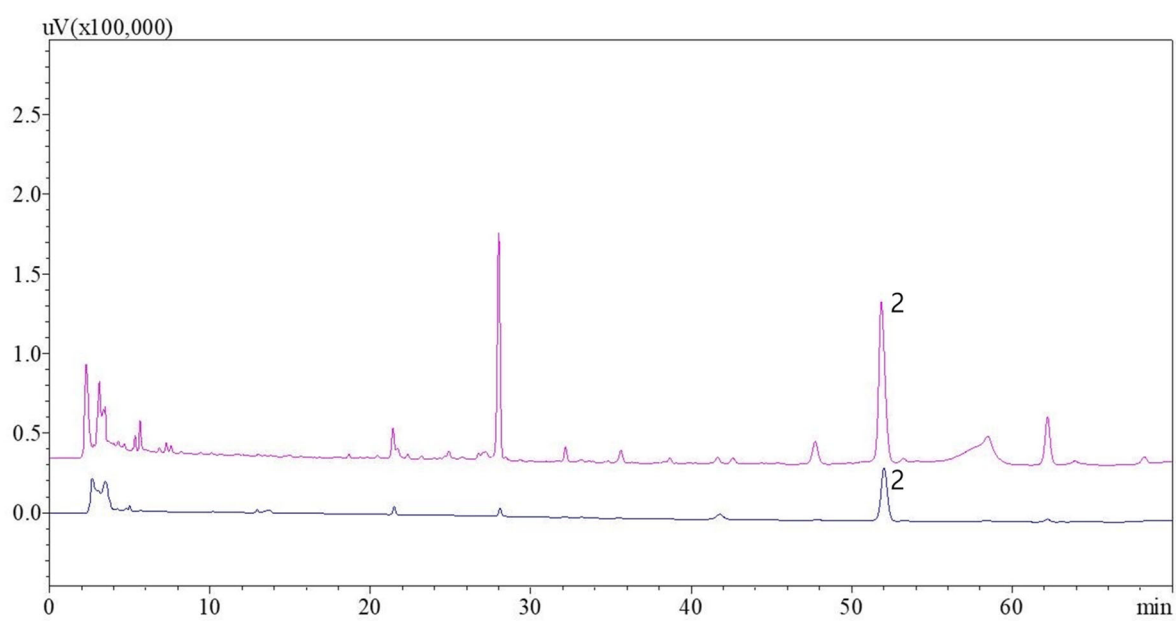

**Figure S3.** The HPLC-UV chromatographs of DC with nortrisflavaspidic acid ABB (2)

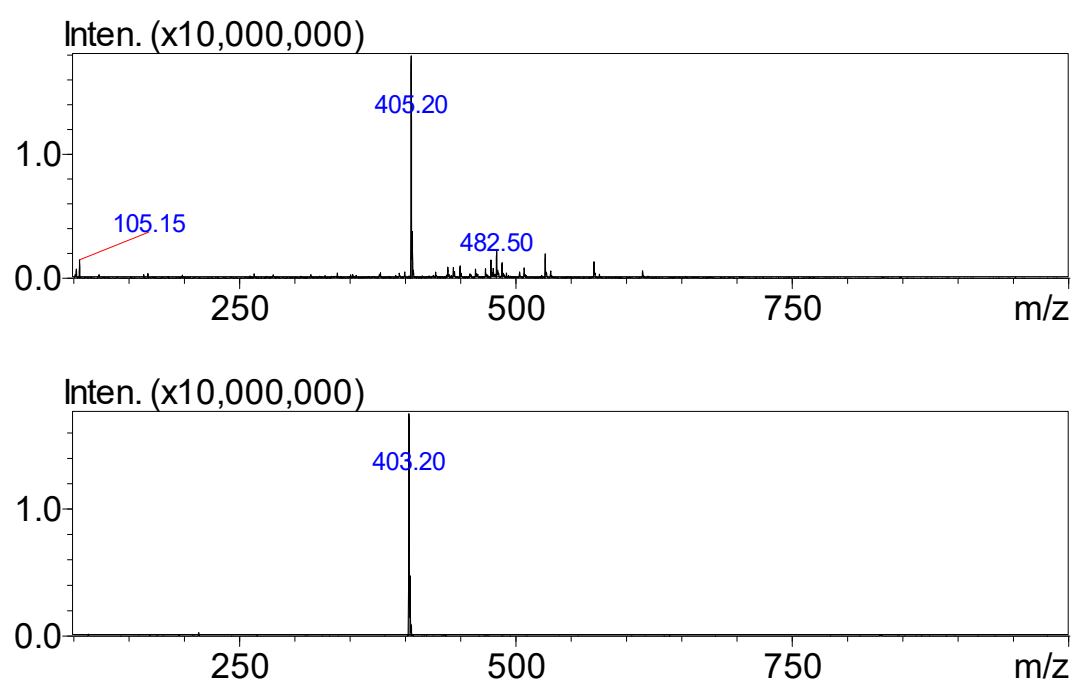

**Figure S4.** ESI-MS spectrum (positive mode and negative mode) of flavaspidic acid AP (1)

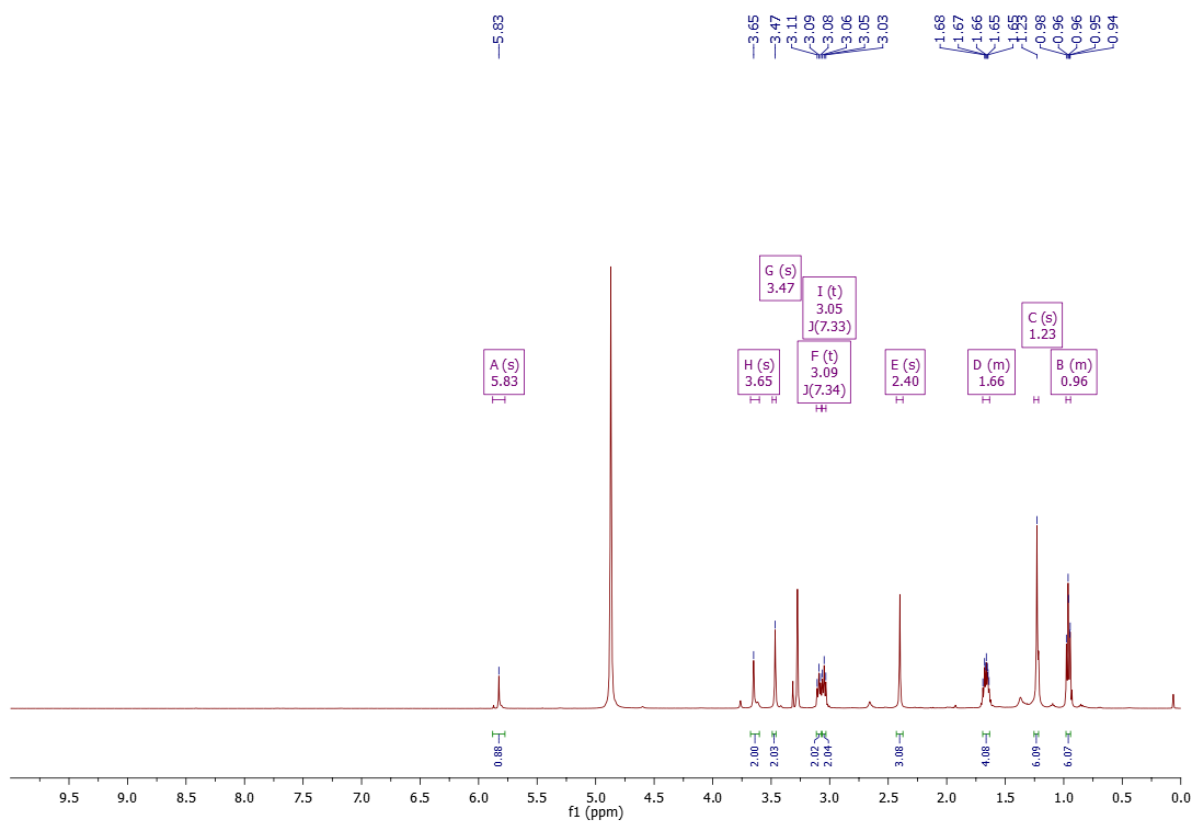

**Figure S5.** <sup>1</sup>H-NMR spectrum (CD<sub>3</sub>OD, 500 MHz) of nortrisflavaspidic acid ABB (2)

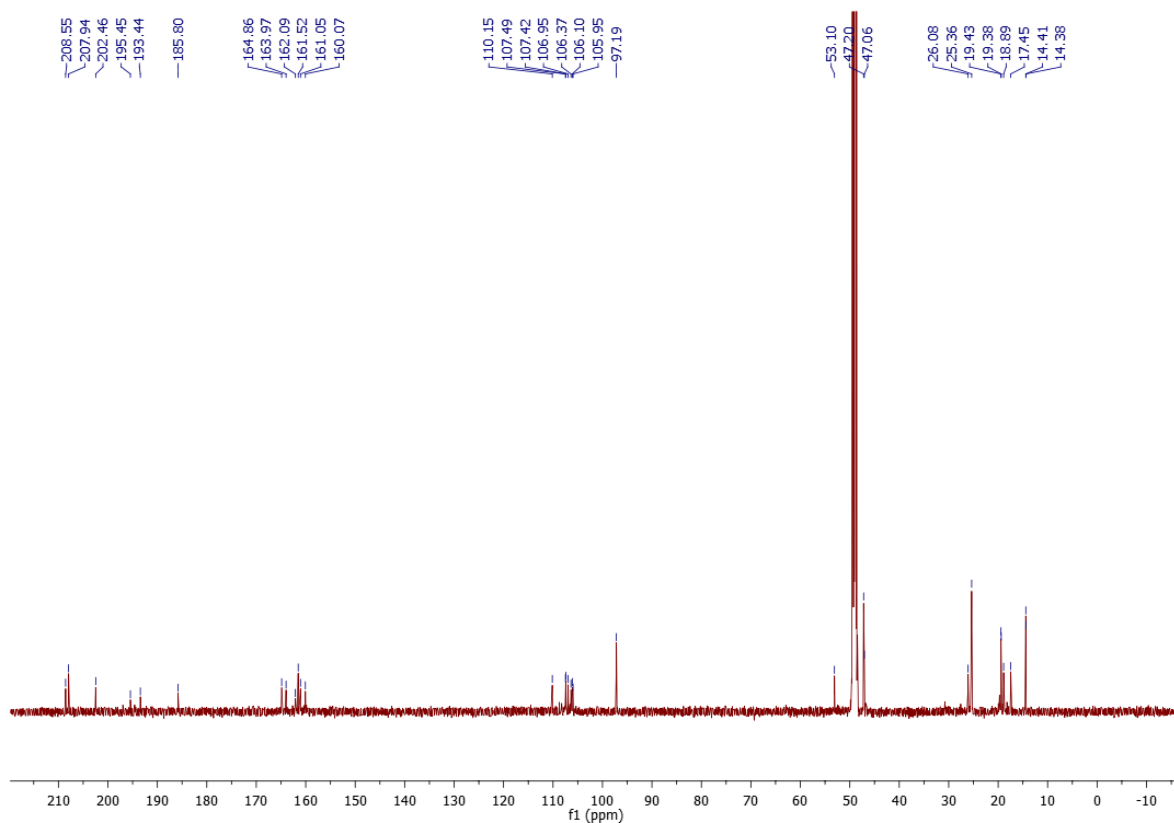

**Figure S6.** <sup>13</sup>C-NMR spectrum (CD<sub>3</sub>OD, 125 MHz) of nortrisflavaspidic acid ABB (2)

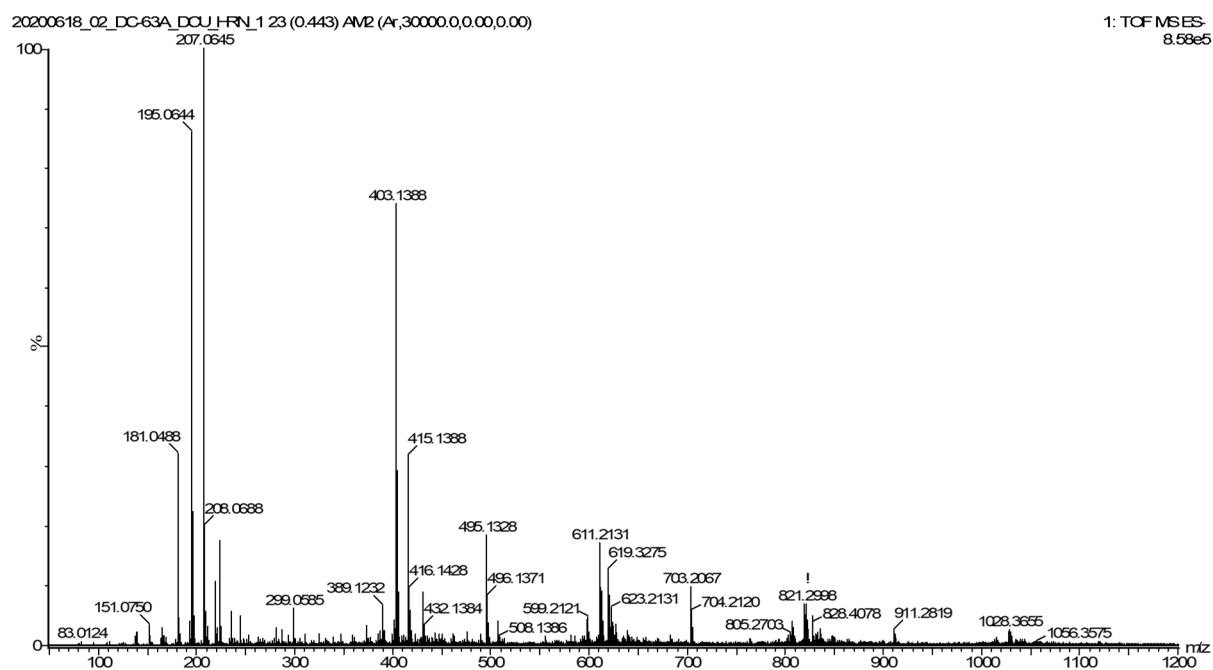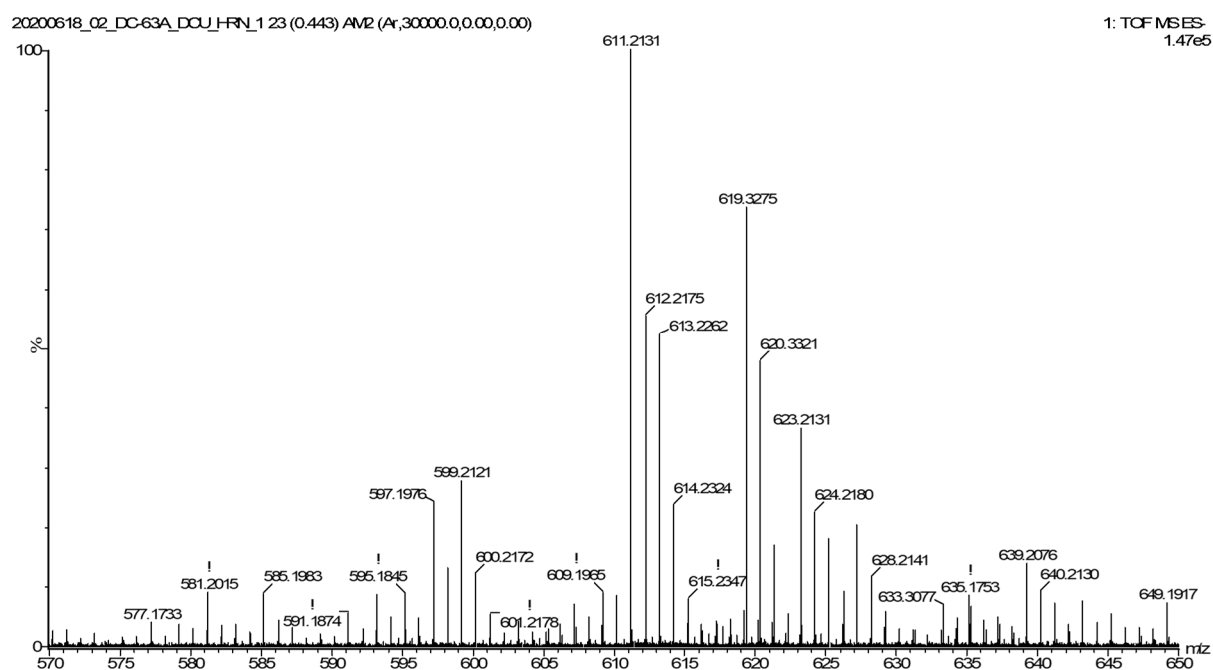

#### Elemental Composition Report

##### Single Mass Analysis

Tolerance = 5.0 PPM / DBE: min = -1.5, max = 100.0

Element prediction: Off

Number of isotope peaks used for i-FIT = 3

##### Monoisotopic Mass, Even Electron Ions

27 formula(e) evaluated with 1 results within limits (all results (up to 1000) for each mass)

Elements Used:

C: 0-40 H: 0-45 O: 0-12

Minimum:

Maximum: 100.0 5.0 -1.5 100.0

| Mass     | Calc. Mass | mDa | PPM | DBE  | i-FIT | Norm | Conf(%) | Formula     |
|----------|------------|-----|-----|------|-------|------|---------|-------------|
| 611.2131 | 611.2129   | 0.2 | 0.3 | 15.5 | 654.2 | n/a  | n/a     | C32 H35 O12 |

**Figure S7.** HR-ESI-MS spectrum (negative mode) of nortrisflavaspidic acid ABB (2)

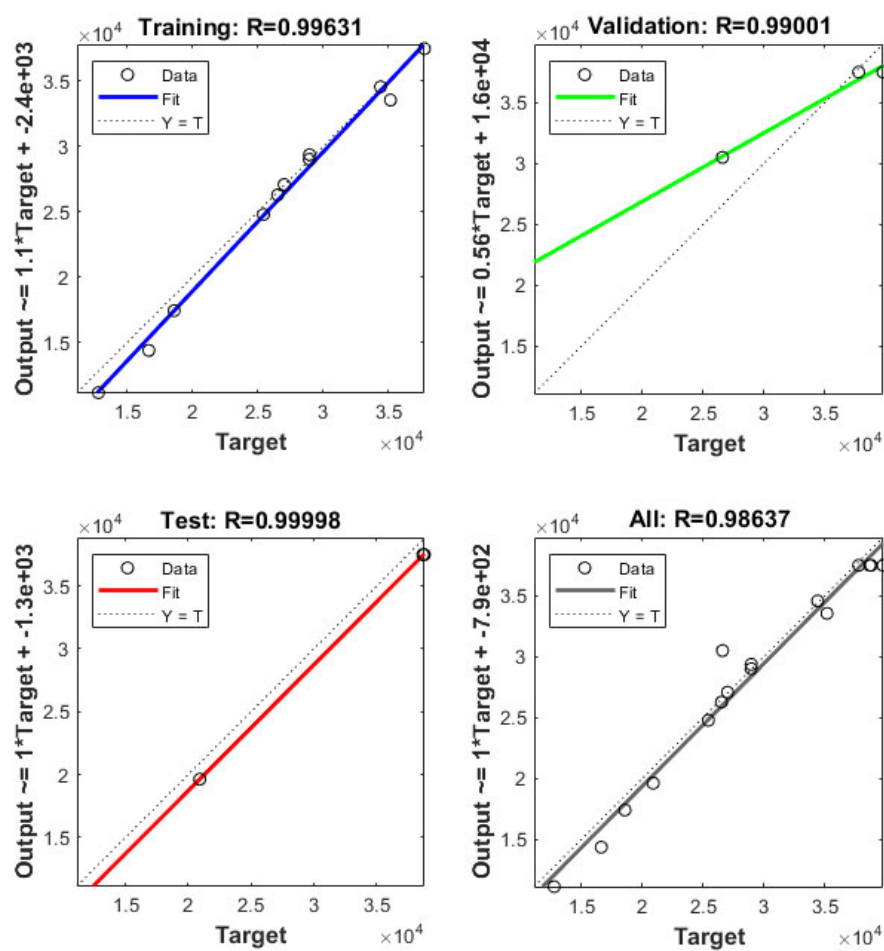

Figure S8. The prediction graphs for them training, validation, and test of the established network
